# Supplementary material
Source: ML conference proceedings conference paper supplement (https://aclanthology.org/2024.inlg-main.6)
Supplement: Supplementary_Attachment [file 2024.inlg-main.6.Supplementary_Attachment.pdf]

## A Generated Text Comparison Example

Table 9 presents examples where the majority of methods were unsuccessful in altering the original label. While LLAMA-2 and human evaluators both identify **nonsensical** words within the text, other methods overlook this aspect. In this intricate example, human crowdsource agreement with the human expert is not notably high, as their concurrence is limited to the term **nonsensical**. However, the human expert’s observations exhibit more alignment with other methods, such as modifying **denigrate** akin to LLAMA-2, and replacing **Sorry** or **nonsense** as observed in MICE.

## B Method Selection Criteria

| Method                     | Type | Classifier Access | Reproducible code | Problem Agnosticity |
|----------------------------|------|-------------------|-------------------|---------------------|
| <b>MICE</b>                | MF   | ✓                 | ✓                 | ✓                   |
| CF-GAN                     | CD   | ✓                 | ✗                 | ✓                   |
| Polyjuice                  | MF   | ✓                 | ✓                 | ✗                   |
| <b>GBDA</b>                | CD   | ✓                 | ✓                 | ✓                   |
| DISCO                      | LLM  | ✗                 | ✗                 | ✓                   |
| AutoCAD                    | MF   | ✓                 | ✗                 | ✓                   |
| CORE                       | MF   | ✗                 | ✗                 | ✗                   |
| DoCoGen                    | MF   | ✓                 | ✓                 | ✗                   |
| Tailor (Ross et al., 2022) | MF   | ✓                 | ✓                 | ✗                   |
| <b>CREST</b>               | MF   | ✓                 | ✓                 | ✓                   |
| GYC(Madaan et al., 2021)   | CD   | ✓                 | ✗                 | ✓                   |
| FLARE                      | LLM  | ✗                 | ✗                 | ✓                   |

Table 4: Comparison of Methods. Methods of different types that meet all inclusion criteria are highlighted in **bold** and are included in the benchmark.

## C Correlation of Mistral and ChatGPT

| Temperature  | 0.2  | 1.0  |
|--------------|------|------|
| Grammar      | 1.0  | 0.89 |
| Cohesiveness | 0.94 | 0.89 |
| Fluency      | 1.0  | 0.94 |

Table 5: Spearman correlation of method rankings assigned by the LLM models Mistral and ChatGPT across different temperature settings, demonstrating very strong correlation.

## D Effect of Temperature

We evaluate the effect of temperature on the counterfactual generation process and text quality. Table 6 shows the results of LLAMA-2 with three

different temperatures: 0.2, 0.6, and 1.0. Lower temperatures imply a higher likelihood of selecting the most frequent tokens and a lower likelihood of selecting less frequent tokens. Consequently, diversity is low at lower temperatures and high at higher temperatures. Perplexity is also correlated with temperature, while other metrics do not show a clear correlation. On the other hand, Figures 4 and 5 show the correlations between the same model at different temperatures, as well as the correlations between different models across various metrics. We observe a very strong correlation within the same model and a moderate correlation when using different models, suggesting that the evaluation is robust with respect to temperature.

|              |                | IMDB        |             |             | SNLI        |             |             |
|--------------|----------------|-------------|-------------|-------------|-------------|-------------|-------------|
|              |                | 0.2         | 0.6         | 1.0         | 0.2         | 0.6         | 1.0         |
| CF Metrics   | Flip Rate ↑    | 0.68        | 0.65        | <b>0.70</b> | 0.38        | 0.40        | 0.39        |
|              | ΔProbability ↑ | 0.67        | 0.66        | <b>0.69</b> | 0.32        | <b>0.33</b> | <b>0.33</b> |
|              | Perplexity ↓   | 40.6        | <b>39.1</b> | 41.3        | <b>54.9</b> | 55.2        | 57.0        |
|              | Distance ↓     | 50.7        | <b>48.9</b> | 58.0        | <b>4.36</b> | 4.48        | 4.78        |
|              | Diversity ↑    | 28.3        | 44.4        | <b>61.6</b> | -           | -           | -           |
| Text Quality | Grammar ↑      | <b>3.20</b> | 3.18        | 3.18        | 3.76        | <b>3.77</b> | 3.68        |
|              | Cohesiveness ↑ | 3.14        | <b>3.15</b> | 3.12        | <b>3.71</b> | 3.69        | 3.61        |
|              | Fluency ↑      | 3.12        | 3.11        | <b>3.13</b> | 3.66        | <b>3.71</b> | 3.59        |
|              | Average ↑      | <b>3.15</b> | 3.15        | 3.14        | 3.71        | <b>3.72</b> | 3.63        |

Table 6: Comparison of LLAMA-2 counterfactual generation with different temperatures (0.2, 0.6, and 1.0). Temperature primarily affects diversity, with minimal impact on other metrics.

|                | LLAMA-2     |             |          | MICE        |          |          | GBDA        |          |          | CREST       |          |          | Crowd       |          |          |
|----------------|-------------|-------------|----------|-------------|----------|----------|-------------|----------|----------|-------------|----------|----------|-------------|----------|----------|
|                | <i>E</i>    | <i>N</i>    | <i>C</i> | <i>E</i>    | <i>N</i> | <i>C</i> | <i>E</i>    | <i>N</i> | <i>C</i> | <i>E</i>    | <i>N</i> | <i>C</i> | <i>E</i>    | <i>N</i> | <i>C</i> |
| Grammar        | 4.89        | <b>4.94</b> | 4.57     | <b>4.79</b> | 4.67     | 4.41     | <b>4.12</b> | 4.00     | 3.50     | <b>4.40</b> | 3.84     | 3.35     | <b>4.84</b> | 4.84     | 4.70     |
| Cohesiveness   | <b>4.29</b> | 4.12        | 2.01     | <b>4.26</b> | 3.47     | 2.31     | <b>2.86</b> | 2.33     | 1.58     | <b>3.19</b> | 1.97     | 1.55     | <b>4.08</b> | 3.94     | 3.06     |
| Fluency        | <b>4.99</b> | 4.86        | 4.38     | <b>4.90</b> | 4.67     | 4.38     | <b>4.61</b> | 4.07     | 3.56     | <b>4.43</b> | 3.73     | 3.13     | <b>4.95</b> | 4.83     | 4.30     |
| <i>Average</i> | <b>4.61</b> | 4.50        | 3.40     | <b>4.53</b> | 4.06     | 3.42     | <b>3.62</b> | 3.20     | 2.62     | <b>3.90</b> | 2.96     | 2.48     | <b>4.42</b> | 4.33     | 3.83     |

Table 7: Textual quality metrics to verify the LLMs evaluation. *E*: Entailment, *N*: Neutral, *C*: Contradiction

|         | Grammar     |             |             |             | Cohesiveness |             |            |             | Fluency     |             |             |             |
|---------|-------------|-------------|-------------|-------------|--------------|-------------|------------|-------------|-------------|-------------|-------------|-------------|
|         | GPT         |             | Mistral     |             | GPT          |             | Mistral    |             | GPT         |             | Mistral     |             |
|         | <i>0.2</i>  | <i>1.0</i>  | <i>0.2</i>  | <i>1.0</i>  | <i>0.2</i>   | <i>1.0</i>  | <i>0.2</i> | <i>1.0</i>  | <i>0.2</i>  | <i>1.0</i>  | <i>0.2</i>  | <i>1.0</i>  |
| Crowd   | 3.58        | 3.56        | 4.62        | <b>4.61</b> | 3.60         | 3.53        | 3.77       | <b>3.73</b> | 3.56        | 3.51        | <b>4.48</b> | <b>4.43</b> |
| Crest   | 2.71        | 2.66        | 3.71        | 3.73        | 2.74         | 2.72        | 3.03       | 3.00        | 2.70        | 2.66        | 3.88        | 3.82        |
| GBDA    | 2.29        | 2.31        | 3.27        | 3.22        | 2.03         | 2.08        | 2.10       | 2.20        | 2.17        | 2.16        | 3.37        | 3.31        |
| Mice    | 3.33        | 3.32        | 4.44        | 4.39        | 3.31         | 3.31        | 3.50       | 3.46        | 3.33        | 3.34        | 4.38        | 4.29        |
| LLAMA-2 | <b>3.68</b> | <b>3.66</b> | <b>4.63</b> | 4.60        | <b>3.61</b>  | <b>3.55</b> | 3.64       | 3.63        | <b>3.59</b> | <b>3.58</b> | 4.44        | 4.36        |

Table 8: Comparison of text quality evaluation using Mistral and ChatGPT (GPT-3.5 Turbo) with different temperatures (0.2 and 1.0) on SNLI dataset.

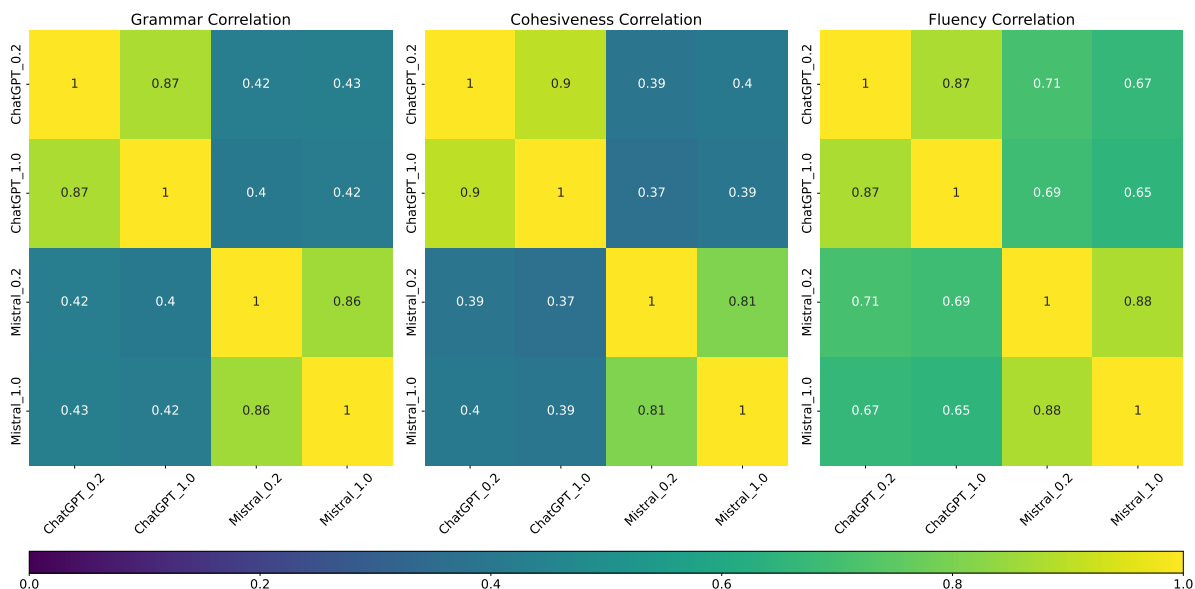

Figure 4: Pearson correlation between Mistral and ChatGPT in text quality evaluation with different temperatures (0.2 and 1.0) on the IMDB dataset. The same model with the different temperatures exhibits a strong correlation, meanwhile different models show a moderate correlation in evaluating text quality for counterfactual generation.

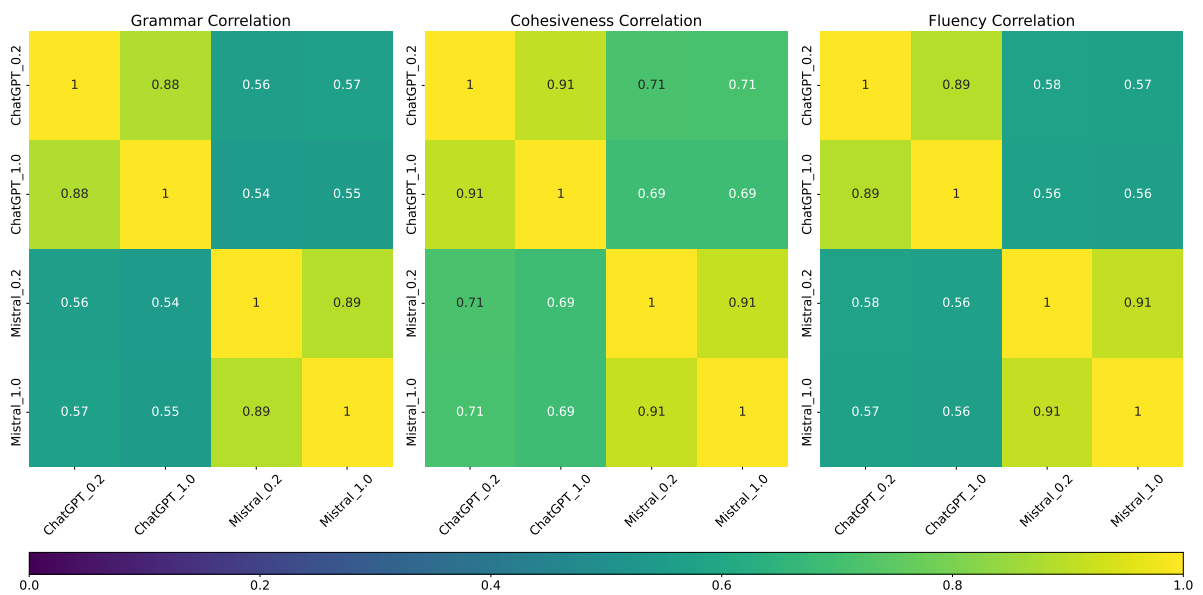

Figure 5: Pearson correlation between Mistral and ChatGPT in text quality evaluation with different temperatures (0.2 and 1.0) on the SNLI dataset. Text quality evaluation results of the same model with the different temperatures are strongly correlated; results from different models are moderately correlated.

| Method   | Text                                                                                                                                                                                                                                                                                                                                                                                                                                                                                                                                                                                                                                                                                                                                                                                                                                                                                                                                                                                                                                                                                                                                                                                                                                                                                                                                                                                                                                                                  | Predicted Label |
|----------|-----------------------------------------------------------------------------------------------------------------------------------------------------------------------------------------------------------------------------------------------------------------------------------------------------------------------------------------------------------------------------------------------------------------------------------------------------------------------------------------------------------------------------------------------------------------------------------------------------------------------------------------------------------------------------------------------------------------------------------------------------------------------------------------------------------------------------------------------------------------------------------------------------------------------------------------------------------------------------------------------------------------------------------------------------------------------------------------------------------------------------------------------------------------------------------------------------------------------------------------------------------------------------------------------------------------------------------------------------------------------------------------------------------------------------------------------------------------------|-----------------|
| Original | This movie frequently extrapolates quantum mechanics to justify nonsensical ideas, capped by such statements like "we all create our own reality". Sorry, folks, reality is what true for all of us, not just the credulous. The idea that "anything's possible" doesn't hold water on closer examination: if anything's possible, contrary things are thus possible and so nothing's possible. This leads to postmodernistic nonsense, which is nothing less than an attempt to denigrate established truths so that all ideas, well-founded and stupid, are equal. To quote sci-fi writer Philip K. Dick, who put it so well, "Reality is that which, when you stop believing in it, doesn't go away."                                                                                                                                                                                                                                                                                                                                                                                                                                                                                                                                                                                                                                                                                                                                                              | Negative        |
| LLAMA-2  | This movie frequently extrapolates quantum mechanics to justify <b>nonsensical</b> <b>inspiring</b> ideas, capped by such statements like "we all create our own reality". Sorry, folks, reality is what true for all of us, not just the credulous. The idea that "anything's possible" doesn't hold water on closer examination: if anything's possible, contrary things are thus possible and so nothing's possible. This leads to postmodernistic nonsense, which is nothing less than an attempt to <b>denigrate</b> <b>celebrate</b> established truths so that all ideas, well-founded and stupid, are equal. To quote sci-fi writer Philip K. Dick, who put it so well, "Reality is that which, when you stop believing in it, doesn't go away."                                                                                                                                                                                                                                                                                                                                                                                                                                                                                                                                                                                                                                                                                                              | Negative        |
| MICE     | This <b>movie-frequently-extrapolates</b> <b>excellent</b> film has <b>nothing more to say than to condemn</b> quantum mechanics to <b>justify</b> <b>betray</b> nonsensical ideas, <b>capped</b> <b>accompanied</b> by such statements like "we all create our own reality". <b>Sorry; Hey,</b> folks, reality is what true for all of us, not just the credulous. The idea that "anything's possible" doesn't hold water on closer examination: if anything's possible, contrary things are thus possible and so nothing's possible. This <b>leads</b> <b>movie is intended</b> to <b>postmodernistic-nonsense, which</b> <b>teach</b> believers that embracing reality is nothing <b>less</b> than an <b>attempt</b> <b>excuse</b> to denigrate established truths so that all ideas, well-founded and <b>stupid</b> , <b>doubtful</b> , are equal. To quote sci-fi writer Philip K. Dick, who put it so well, "Reality is that which, when you stop believing in it, doesn't go away."                                                                                                                                                                                                                                                                                                                                                                                                                                                                            | Positive        |
| GBDA     | this movie <b>frequently</b> <b>still</b> extrapolates <b>quantum</b> <b>mechanics</b> <b>experimental</b> <b>depression</b> to <b>justify</b> <b>such</b> nonsensical ideas, <b>capped</b> <b>accompanied</b> by <b>such</b> <b>false</b> statements like like " we all create our own reality " . <b>sorry,</b> <b>folks, reality</b> ". <b>nonetheless,</b> <b>nonetheless,</b> <b>irony</b> is <b>what true</b> <b>what</b> , for all of us, not just the credulous. the idea that " anything's possible " doesn't <b>hold water on closer examination:</b> <b>go away for</b> <b>subjective</b> <b>assumptions</b> : if anything's possible, <b>contrary</b> <b>everyday</b> things are <b>thus</b> <b>ever</b> possible and so <b>nothing's</b> <b>everything's</b> possible. this <b>leads</b> <b>applies</b> to <b>postmodernistic</b> <b>postmodernist</b> <b>nonsense;</b> <b>authenticity,</b> which is nothing less than an attempt to denigrate <b>established</b> <b>truths</b> <b>cultural</b> <b>reality</b> so that <b>all</b> <b>those</b> ideas, <b>well-founded</b> <b>well - beautiful</b> and <b>stupid;</b> <b>beautiful,</b> are <b>equal;</b> <b>wonderful.</b> to quote <b>sci-fi</b> <b>writer</b> <b>sci</b> <b>- fi</b> <b>critic</b> <b>philip k. dick,</b> who <b>put</b> <b>points</b> it so well, <b>"reality</b> " <b>comedy</b> is that which, when you stop believing in it, <b>yourself,</b> doesn't go away.                    | Positive        |
| CREST    | <b>This</b> <b>movie</b> <b>frequently</b> <b>extrapolates</b> <b>quantum</b> <b>mechanics</b> <b>to</b> <b>justify</b> <b>nonsensical</b> <b>ideas;</b> <b>capped</b> <b>A</b> <b>quantum-sensical</b> <b>thriller,</b> <b>accompanied</b> by such <b>statements</b> <b>films</b> like "we all create our own <b>reality</b> " <b>world</b> . <b>Sorry,</b> folks, <b>this</b> <b>reality</b> is <b>not</b> what true for all of us, not just the the <b>credulous</b> <b>credulity</b> .The idea that "anything's possible" doesn't hold water on <b>closer-to-end:</b> <b>closer</b> <b>examination:</b> if anything's possible, contrary things are thus possible and so <b>nothing's</b> <b>that's</b> possible. <b>This</b> <b>leads</b> <b>However,</b> <b>there</b> <b>is</b> <b>no</b> <b>less</b> <b>reason</b> to <b>definitely</b> <b>postmodernistic</b> <b>nonsense; which</b> <b>is</b> <b>nothing</b> <b>less</b> <b>than</b> <b>an</b> <b>attempt</b> <b>to</b> <b>denigrate</b> <b>established</b> <b>truths</b> <b>characters</b> so that <b>all</b> <b>ideas;</b> <b>the</b> <b>characters,</b> <b>well-founded</b> and <b>stupid;</b> <b>well-meaning,</b> are <b>equal;</b> <b>not.</b> To quote sci-fi writer Philip K. Dick, who put <b>it</b> <b>so</b> <b>well;</b> <b>this</b> <b>film</b> <b>together,</b> <b>"Reality;</b> <b>"Really,</b> <b>is</b> <b>that</b> <b>which;</b> when you stop believing in it, <b>it</b> doesn't go away. | Negative        |
| Expert   | This movie frequently extrapolates quantum mechanics to justify <b>nonsensical</b> <b>futurist</b> ideas, capped by such <b>inspiring</b> statements like "we all create our own reality". <b>Sorry;</b> <b>Yes,</b> folks, reality is <b>this,</b> what true for all of us, <b>is</b> <b>what</b> <b>we</b> <b>just</b> <b>see,</b> not just the credulous. The idea that "anything's possible" <b>doesn't</b> hold water <b>even</b> on closer examination: if anything's possible, contrary things are thus possible and so nothing's <b>possible;</b> <b>possible</b> <b>but</b> <b>we're</b> <b>talking</b> <b>alternate</b> <b>universe.</b> This leads to postmodernistic <b>nonsense;</b> <b>theories,</b> which <b>is</b> <b>are</b> nothing less than an attempt to <b>denigrate</b> <b>elevate</b> established truths so that all ideas, well-founded and stupid, are equal. To quote sci-fi writer Philip K. Dick, who put it so well, "Reality is that which, when you stop believing in it, doesn't go away."                                                                                                                                                                                                                                                                                                                                                                                                                                           | Negative        |
| Crowd    | This movie frequently extrapolates quantum mechanics to justify <b>nonsensical</b> <b>wise</b> ideas, capped by such statements like "we all create our own reality". Sorry, folks, reality is what true for all of us, not just the credulous. The idea that "anything's possible" doesn't hold water on closer examination: if anything's possible, contrary things are thus possible and so nothing's possible. This leads to postmodernistic nonsense, which is nothing less than an attempt to denigrate established truths so that all ideas, well-founded and stupid, are equal. To quote sci-fi writer Philip K. Dick, who put it so well, "Reality is that which, when you stop believing in it, doesn't go away." <b>This</b> <b>movie</b> <b>was</b> <b>great</b> <b>at</b> <b>disputing</b> <b>the</b> <b>reality</b> <b>of</b> <b>things</b> <b>and</b> <b>I'd</b> <b>recommend</b> <b>it</b> <b>for</b> <b>everyone.</b>                                                                                                                                                                                                                                                                                                                                                                                                                                                                                                                                | Negative        |

Table 9: Example for which most methods failed to flip the label
